# Supplementary material for: A novel 3,6-diamino-1,8-naphthalimide derivative as a highly selective fluorescent “turn-on” probe for thiols
Source: Royal Society of Chemistry journal article supplement (doi:10.1039/c5ra03849a), 2015-01-01
Supplement: c5ra03849a1.pdf [file c5ra03849a1.pdf]

## A novel 3, 6-diamino-1, 8-naphthalimide derivative as a highly selective fluorescent “turn-on” probe for thiols

Cheng Dong <sup>a</sup>, Chun-Qiong Zhou <sup>a,\*</sup>, Jian-Wei Yang <sup>a</sup>, Ting-Cong Liao <sup>a</sup>, Jin-Xiang Chen <sup>a</sup>,  
Cai-Xia Yin <sup>b</sup> and Wen-Hua Chen <sup>a,\*</sup>

<sup>a</sup> *Guangdong Provincial Key Laboratory of New Drug Screening, School of Pharmaceutical Sciences, Southern Medical University, Guangzhou 510515, P. R. China*

<sup>b</sup> *Key Laboratory of Chemical Biology and Molecular Engineering of Ministry of Education, Institute of Molecular Science, Shanxi University, Taiyuan 030006, China*

### Supporting Information

#### Experimental

**Generals.** <sup>1</sup>H and <sup>13</sup>C NMR spectra were recorded in *d*<sub>6</sub>-DMSO, CD<sub>3</sub>OD, CDCl<sub>3</sub> or *d*<sub>6</sub>-DMSO-D<sub>2</sub>O (5/2, v/v) on a Varian Mercury 400 spectrometer. LR-ESI-MS and HR-ESI-MS spectra were measured on Waters UPLC/Quattro Premier XE and Agilent 6460 Triple Quadrupole mass spectrometers, respectively. Silica gel 60 Å (reagent pure, Qingdao Haiyang Chemical Co. Ltd) was used for column chromatography. Analytical thin-layer chromatography was performed on silica gel plates 60 GF254 (chemical pure, Qingdao Haiyang Chemical Co. Ltd). Detection on TLC was made by use of a UV lamp (254 or 365 nm). Fluorescence spectra were measured on a Shimadzu RF-5301PC spectrofluorimeter.

UV-Vis spectra were measured on a TU-1901 spectrophotometer. Fluorescence images of HepG2 cells were undertaken with Olympus FV1000 confocal laser scanning microscopy.

*N*-butyl-3, 6-dinitro-1, 8-naphthalimide **3** was prepared according to the reported literature. <sup>1</sup>All reagents and solvents were purchased from commercial sources and were of analytical grade. Solvents were dried according to standard procedures.

## Synthesis of compounds 1 and 2

*Compound 2.* To a solution of compound **3** (155 mg, 0.45 mmol) in ethanol (10 mL) was added 20 mg of 10% Pd/C in ethanol (3 mL). The resulting mixture was stirred under the atmosphere of hydrogen at 40 ° C for 3 h, and then concentrated under reduced pressure. The obtained residue was purified by chromatography on a silica gel column, eluted with CHCl<sub>3</sub>/CH<sub>3</sub>OH (400/1, v/v) to afford compound **2** (108 mg, 85%) as a yellowish solid having <sup>1</sup>H NMR (400 MHz, *d*<sub>6</sub>-DMSO) δ 7.58 (s, 2H), 6.93 (s, 2H), 5.68 (s, 4H), 3.98 (t, *J* = 7.2 Hz, 2H), 1.57 (m, 2H), 1.35 (m, 2H), 0.92 (t, *J* = 7.2 Hz, 3H); <sup>13</sup>C NMR (100 MHz, *d*<sub>6</sub>-DMSO) δ 164.3, 148.0, 135.9, 122.7, 117.4, 110.0, 30.1, 20.2, 14.1 and ESI-MS *m/z*: 284.2 ([M+H]<sup>+</sup>).

*Compound 1.* A solution of compound **2** (28 mg, 0.10 mmol) and 2, 6-dimethylpyridine (54 mg, 0.50 mmol) in anhydrous CH<sub>2</sub>Cl<sub>2</sub> (20 mL) was stirred at 0 °C for 15 min and then added to a solution of 2, 4-dinitrobenzenesulfonyl chloride (133 mg, 0.50 mmol) in anhydrous CH<sub>2</sub>Cl<sub>2</sub> (10 mL). The resulting mixture was stirred at room temperature for 45 h and concentrated under reduced pressure. The obtained residue was purified by chromatography on a silica gel column, eluted with CHCl<sub>3</sub>/CH<sub>3</sub>OH (200/1, v/v) to afford compound **1** (14 mg, 28%) as a yellow solid having <sup>1</sup>H NMR (400 MHz, *d*<sub>6</sub>-DMSO) δ 8.89 (d, *J* = 2.0 Hz, 1H), 8.58 (m, 1H), 8.30 (d, *J* = 3.2 Hz, 1H), 7.87 (d, *J* = 2.4 Hz, 1H), 7.86 (d, *J* = 2.4 Hz, 1H), 7.69 (d, *J* = 2.0 Hz, 1H), 7.14 (d, *J* = 2.0 Hz, 1H), 3.97 (t, *J* = 7.2 Hz, 2H), 1.56 (m, 2H), 1.32 (m, 2H), 0.91 (t, *J* = 7.2 Hz, 3H); <sup>13</sup>C NMR (100 MHz, *d*<sub>6</sub>-DMSO) δ 163.7, 163.5, 150.6, 149.0, 148.3, 136.4, 135.4, 134.6, 132.1, 127.7, 123.6, 123.0, 121.6, 120.8, 120.6, 119.4, 118.5, 111.2, 30.0, 20.2, 14.1; ESI-MS *m/z*: 514.2 ([M+H]<sup>+</sup>) and HR-ESI-MS for C<sub>22</sub>H<sub>19</sub>N<sub>5</sub>O<sub>8</sub>S ([M+H]<sup>+</sup>) calcd: 514.1033, found: 514.1029.

## Determination of quantum yields

The quantum yield of compound **2** was measured by using the protocol described in literature.<sup>2</sup> Thus, the absorption and emission spectra of compound **2** were measured in ethanol. It showed absorption and emission maxima at 415 nm ( $\epsilon = 8300 \text{ M}^{-1}\cdot\text{cm}^{-1}$ ) and 560 nm, respectively. Coumarin **4** was chosen as a standard because its absorption and emission

spectra largely overlap those of compound **2** in ethanol. Fluorescence quantum yield  $\Phi_X$  of compound **2** was calculated according to eq (1).

$$\Phi_X = \Phi_S \times [\text{Abs}_S / \text{Abs}_X] \times [A_{FX} / A_{FS}] \times [N_X / N_S]^2 \quad (1)$$

Where,  $\Phi_S$  (= 0.78) is the reported quantum yield of coumarin **4** in ethanol;  $\text{Abs}_S$  and  $\text{Abs}_X$  are the absorbance at the excitation wavelengths of coumarin **4** and compound **2**, respectively;  $A_{FS}$  and  $A_{FX}$  are the areas under the emission spectra of coumarin **4** and compound **2**, respectively; and  $N_S$  and  $N_X$  are the refractive indexes of the solvents used for coumarin **4** and compound **2**, respectively. Here ethanol was used in both cases, thus  $N_S = N_X = 1.3611$ . It has been reported that *N*-butyl-4-amino-1, 8-naphthalimide has the absorption and emission maxima at 430 nm ( $\epsilon = 11600 \text{ M}^{-1} \cdot \text{cm}^{-1}$ ) and 541 nm ( $\Phi = 0.13$ ), respectively. <sup>3</sup>

**Table 1** Results for coumarin **4** and compound **2**

| Sample            | Abs    | A <sub>F</sub> | Φ      |
|-------------------|--------|----------------|--------|
| Coumarin <b>4</b> | 0.0464 | 31189          | 0.78   |
| Compound <b>2</b> | 0.0160 | 819            | 0.0594 |

### Procedures of thiols sensing

A stock solution of compound **1** (1 mM) was prepared in DMSO and then diluted to the corresponding concentration (25 μM) with 1 : 1 DMSO-PBS buffer (0.01 M, pH 7.4). Fluorescence spectra were recorded in an indicated time after the addition of amino acids and different kinds of common species ( $\lambda_{\text{ex}} = 415 \text{ nm}$ , ex/em = 5 nm/5 nm).

### Effect of pH value

The effect of pH on the fluorescence intensities of compound **1** (25 μM) was determined in the absence and presence of Cys (250 μM), respectively. The reaction of compound **1** and Cys was carried out at room temperature for 120 min, in 1 : 1 DMSO-PBS buffer (0.01 M) of varying pH from 3.0 to 9.0. The corresponding fluorescence spectrum at each pH was recorded ( $\lambda_{\text{ex}} = 415 \text{ nm}$ ). The fluorescence intensities at 560 nm were plotted against pH, which is shown in Fig. S9.

## Kinetic study

The kinetic profiles of the reaction were examined under *pseudo-first-order* conditions with a large excess of Cys, Hcy, or GSH over compound **1** in 1 : 1 DMSO-PBS (0.01 M, pH 7.4) at room temperature. The *pseudo-first-order* rate constant  $k$  was calculated according to eqn (2):

$$\ln[F_{\max}/(F_{\max} - F_t)] = kt \quad (2)$$

Wherein  $F_t$  and  $F_{\max}$  are the fluorescence intensity at 560 nm at time  $t$  and when the reaction is complete, respectively.  $k$  is the *pseudo-first-order* rate constant.<sup>4</sup>

## Detection limit

The detection limit was calculated based on the fluorescence titration. The slit was adjusted to 10 nm. To determine the S/N ratio, the emission intensity of compound **1** (25  $\mu\text{M}$ ) in the absence of Cys was measured by 10 times and the standard deviation of blank measurements was determined. Under the present conditions, a good linear relationship between the fluorescence intensity and the Cys concentration was obtained in the range of 0~100  $\mu\text{M}$  ( $R = 0.9998$ , Fig. S11). The detection limit was then calculated with the equation: detection limit =  $3\sigma_{\text{bi}}/m$ , wherein  $\sigma_{\text{bi}}$  is the standard deviation of blank measurements and  $m$  is the slope of the straight line between the fluorescence intensity and the concentration of Cys.<sup>5</sup> The detection limit was calculated to be  $2.0 \times 10^{-7}$  M at  $S/N = 3$  (signal-to-noise ratio of 3 : 1) for Cys. Similarly, the detection limit was calculated to be  $4.3 \times 10^{-7}$  M for GSH (Fig. S12) and  $1.2 \times 10^{-6}$  M for Hcy (Fig. S13) at  $S/N = 3$ , respectively.

## Fluorescence Imaging

HepG2 cells were cultured in Dulbecco's modified Eagle's medium (DMEM) with 10% fetal bovine serum (FBS) and 1% double resistant (50 U/mL penicillin, 50  $\mu\text{g}/\text{mL}$  streptomycin) at 37 °C under a humidified atmosphere containing 5%  $\text{CO}_2$ . Exponentially growing cells were placed in 15 mm culture dish ( $1 \times 10^6$  cells/mL) and incubated at 37 °C for 12 h for attachment. HepG2 cells were treated with 5  $\mu\text{M}$  of compound **1** in culture media for 2 h at 30 °C and washed 3 times with PBS buffer (0.01 M, pH 7.4). For the control experiment, the cells were

treated with *N*-ethylmaleimide (NEM, 20  $\mu$ M) in culture media for 30 min at 30 °C. After washed with PBS buffer to remove the remaining NEM, the cells were further incubated with 5  $\mu$ M of compound **1** in culture media for 2 h at 30 °C. <sup>6</sup>

## References

1. M. S. Alexiou and J. H. P. Tyman, *J. Chem. Res. (S)* 2001, **2**, 59.
2. W. Xuan, R. Pan, Y. Cao, K. Liu, W. Wang, *Chem. Commun.* 2012, **48**, 10669.
3. S. Fery-Forgues, D. Lavabre, *J. Chem. Educ.* 1999, **76**, 1260.
4. L. Yuan, W. Y. Lin and Y. T. Yang, *Chem. Commun.* 2011, **47**, 6275.
5. Y. Q. Sun, M. L. Chen, J. Liu, X. Lv, J. F. Li and W. Guo, *Chem. Commun.* 2011, **47**, 11029.
6. Y. H. Chen, J. Z. Zhao, H. M. Guo and L. J. Xie, *J. Org. Chem.* 2012, **77**, 2192.

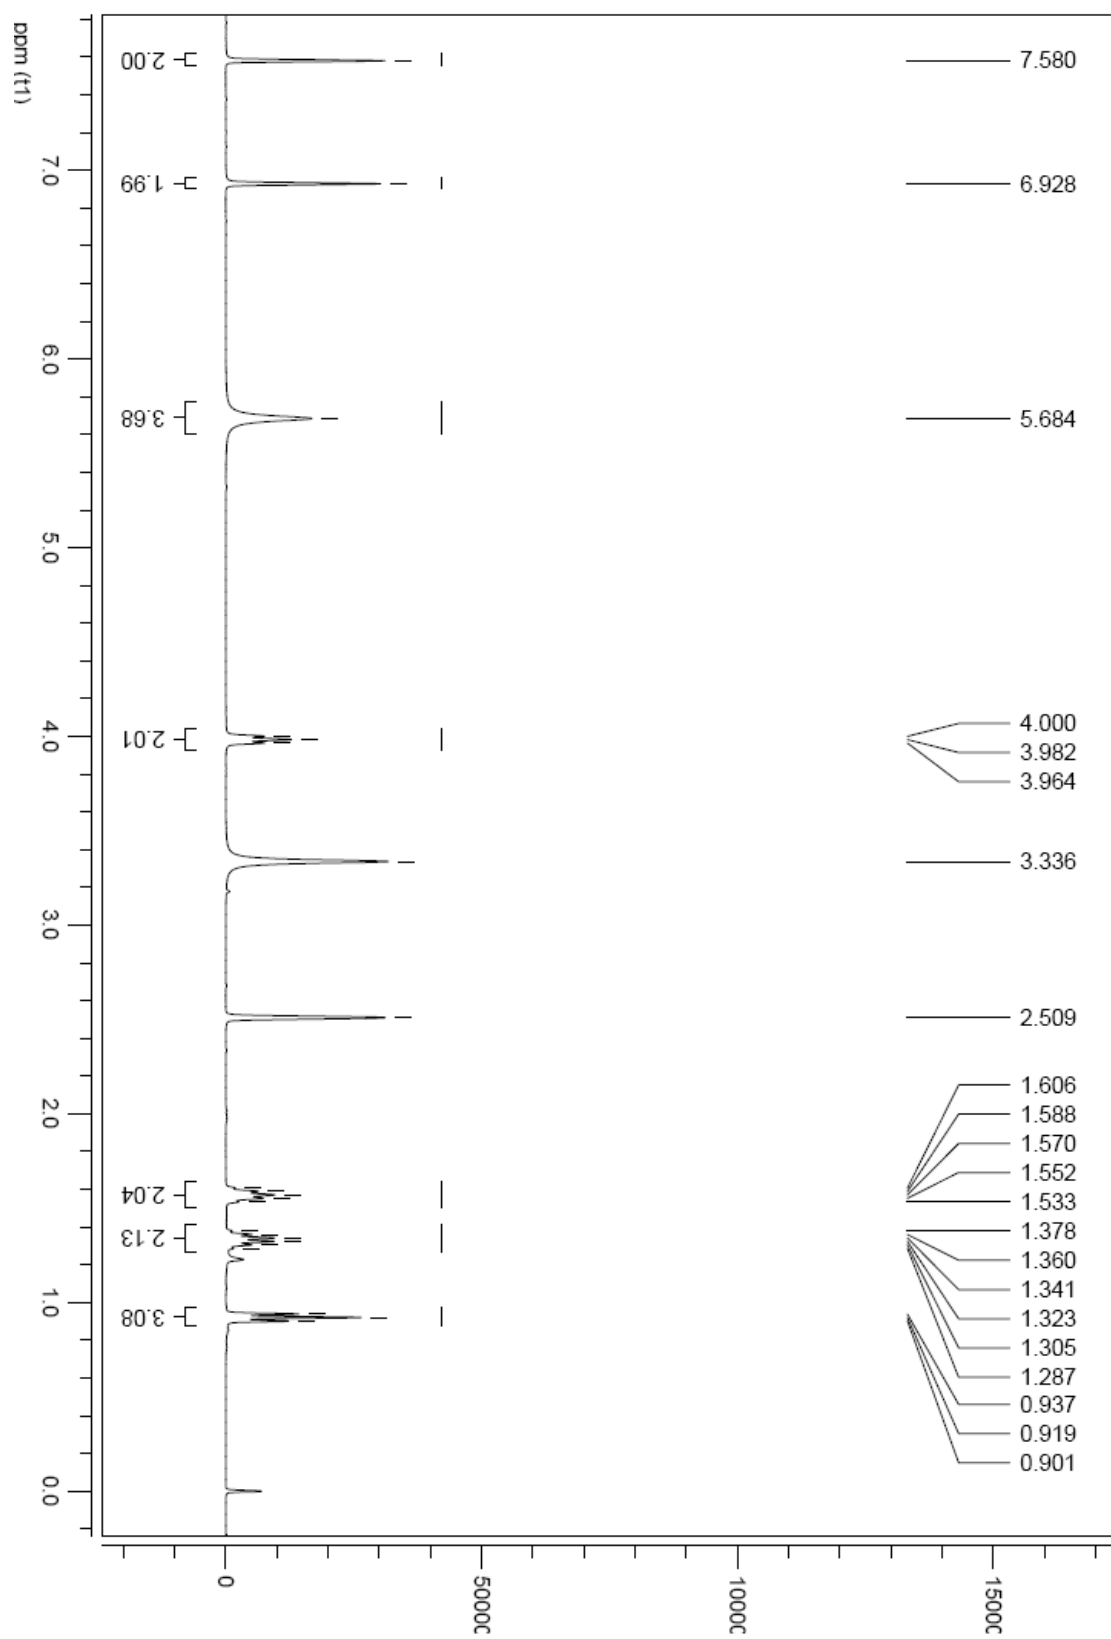

**Fig. S1**  $^1\text{H}$  NMR (400 MHz) of compound 2 in  $d_6$ -DMSO.

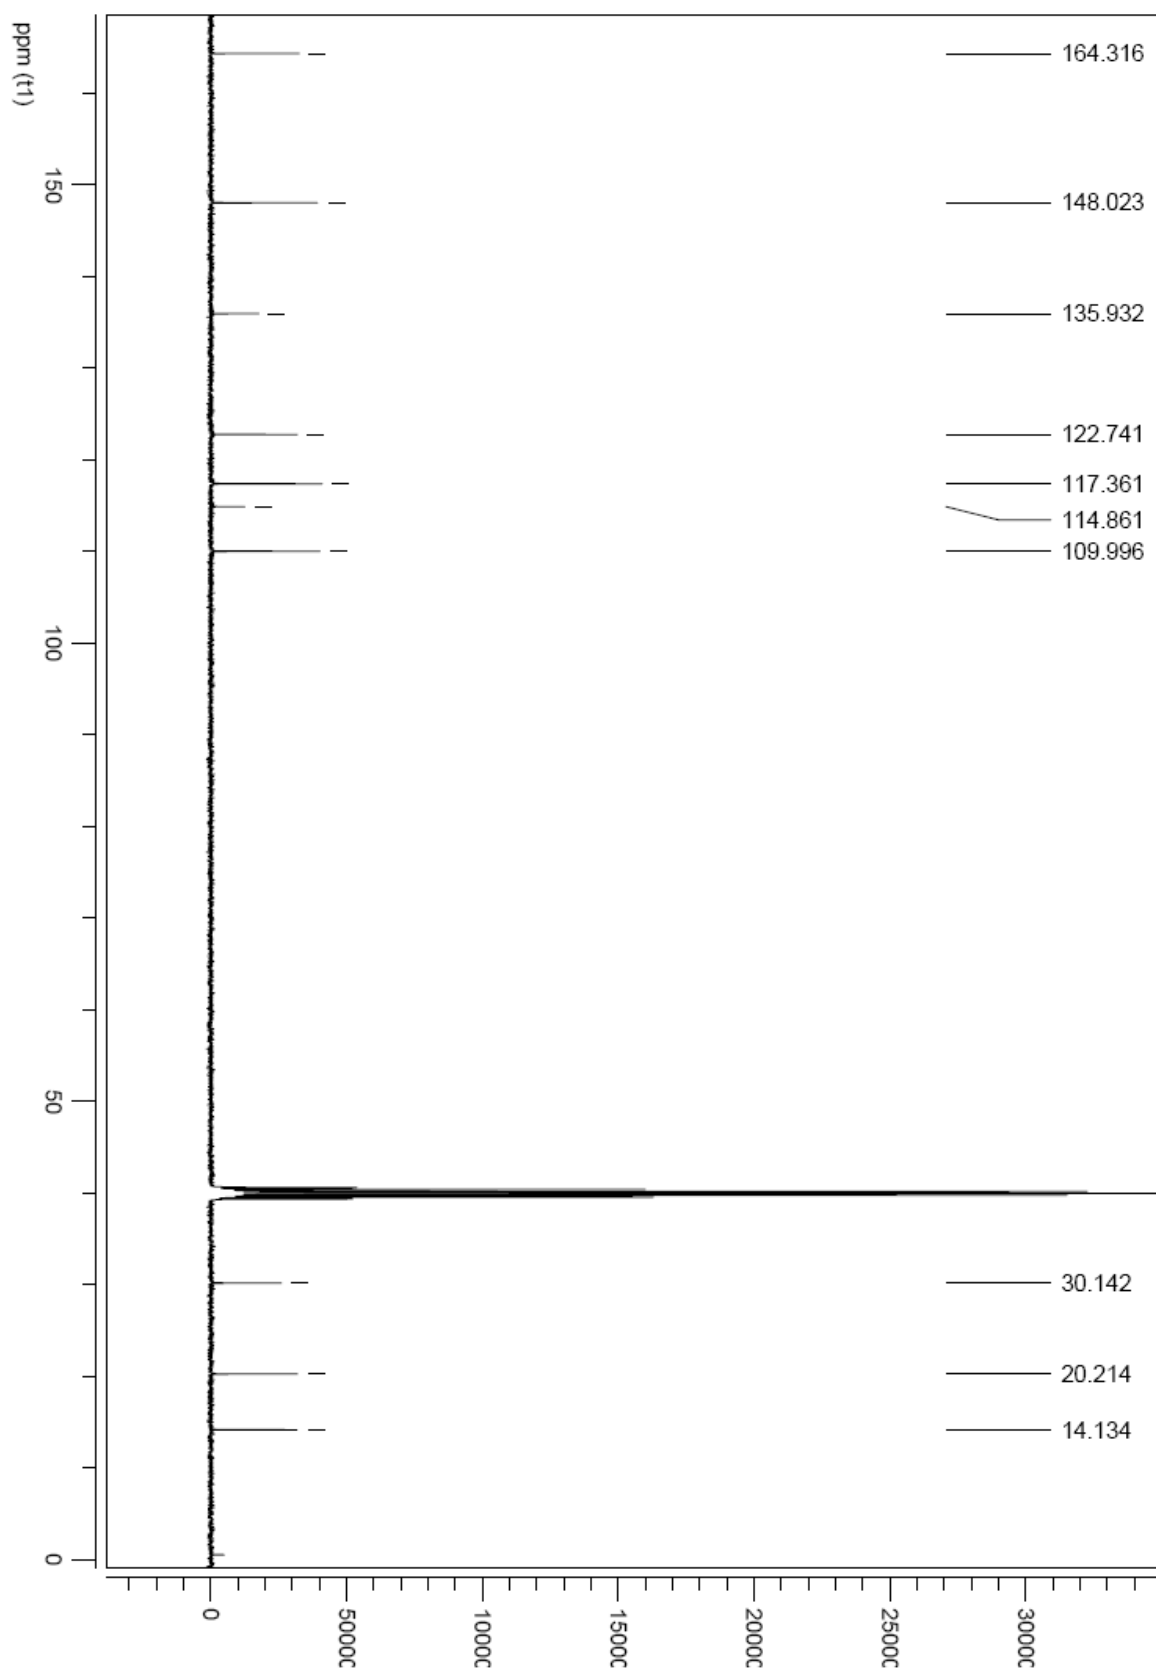

**Fig. S2**  $^{13}\text{C}$  NMR (100 MHz) of compound 2 in  $d_6$ -DMSO.

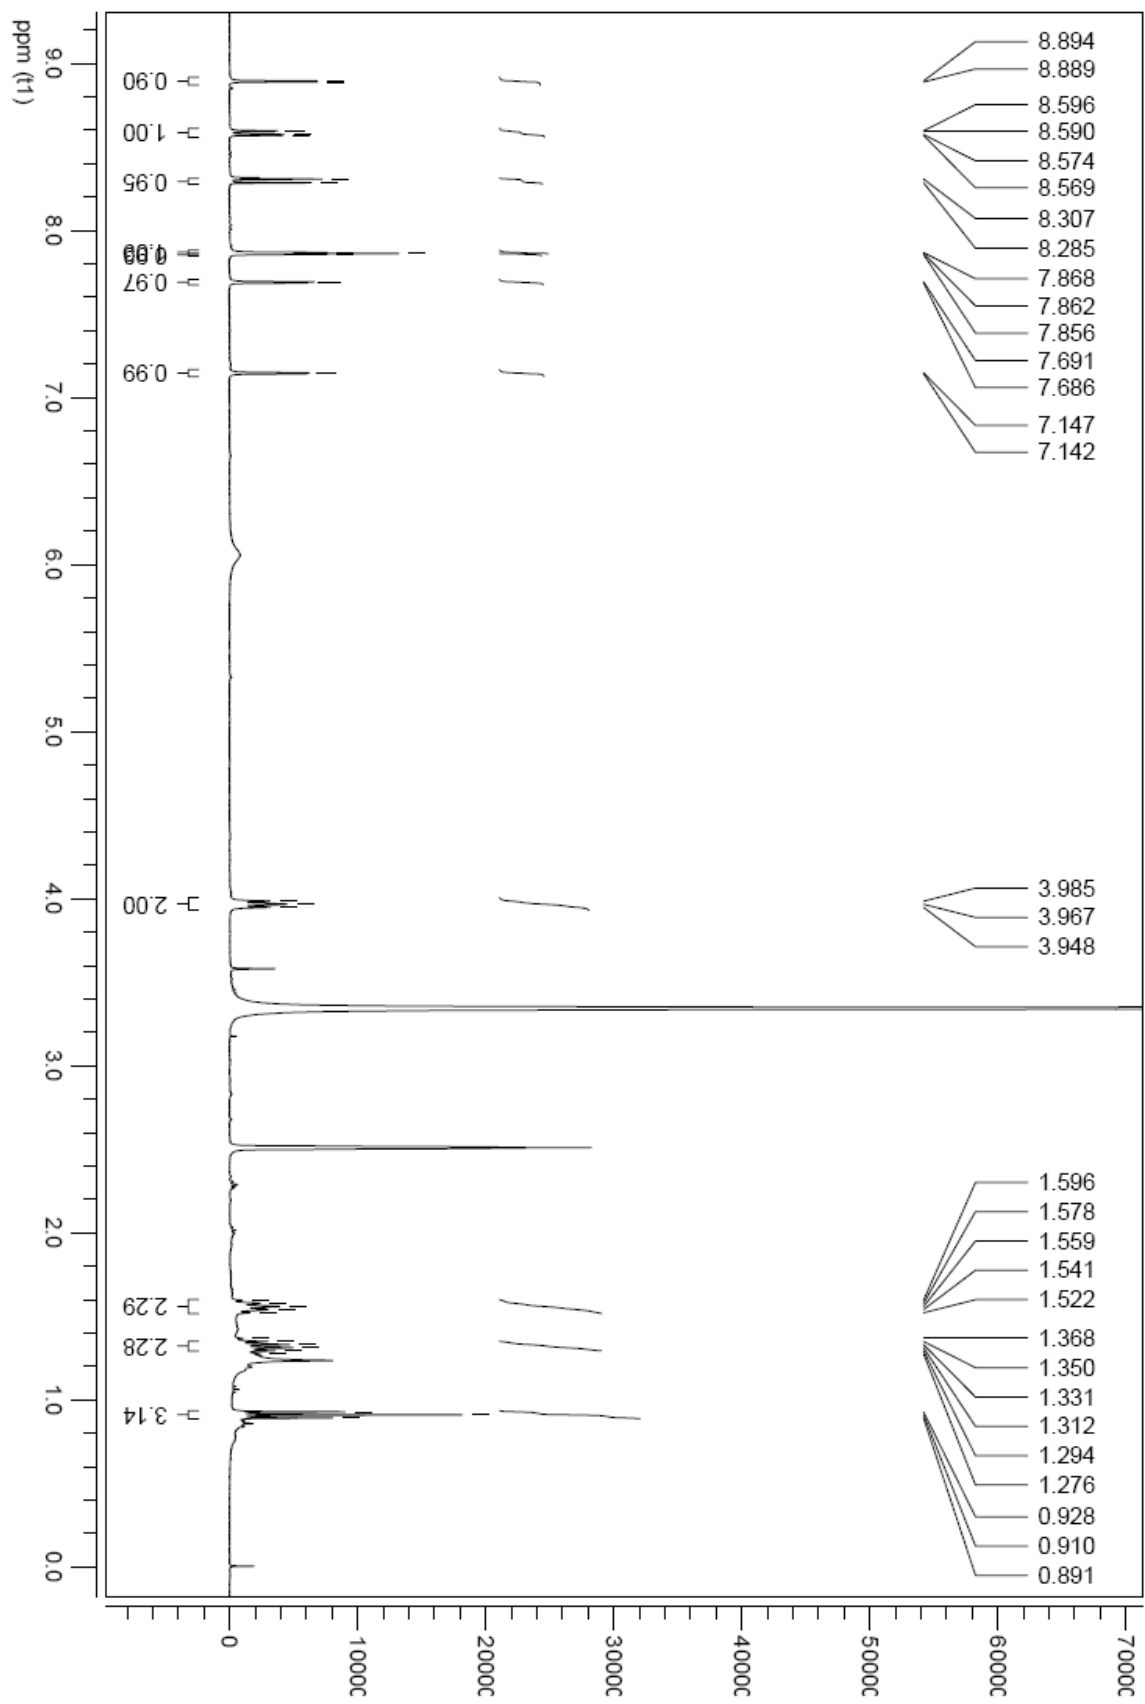

**Fig. S3** <sup>1</sup>H NMR (400 MHz) of compound **1** in *d*<sub>6</sub>-DMSO.



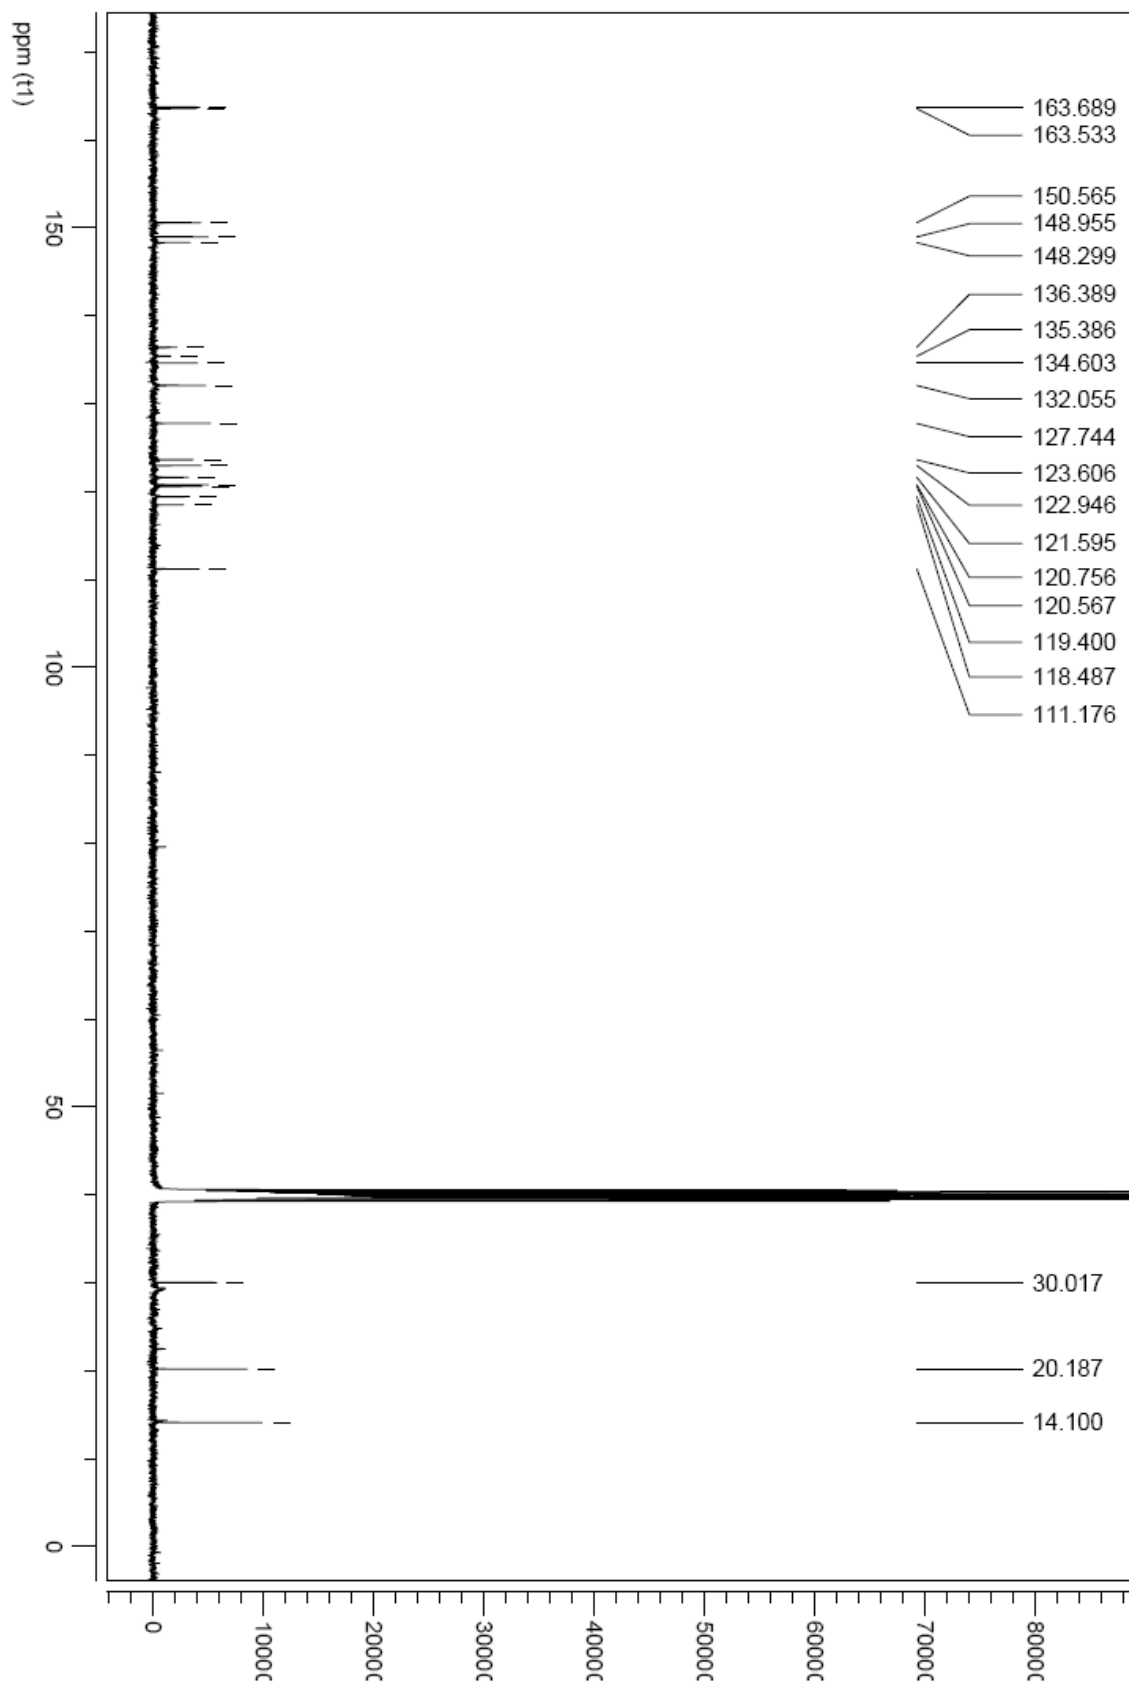

**Fig. S4**  $^{13}\text{C}$  NMR (100 MHz) of compound **1** in  $d_6$ -DMSO.

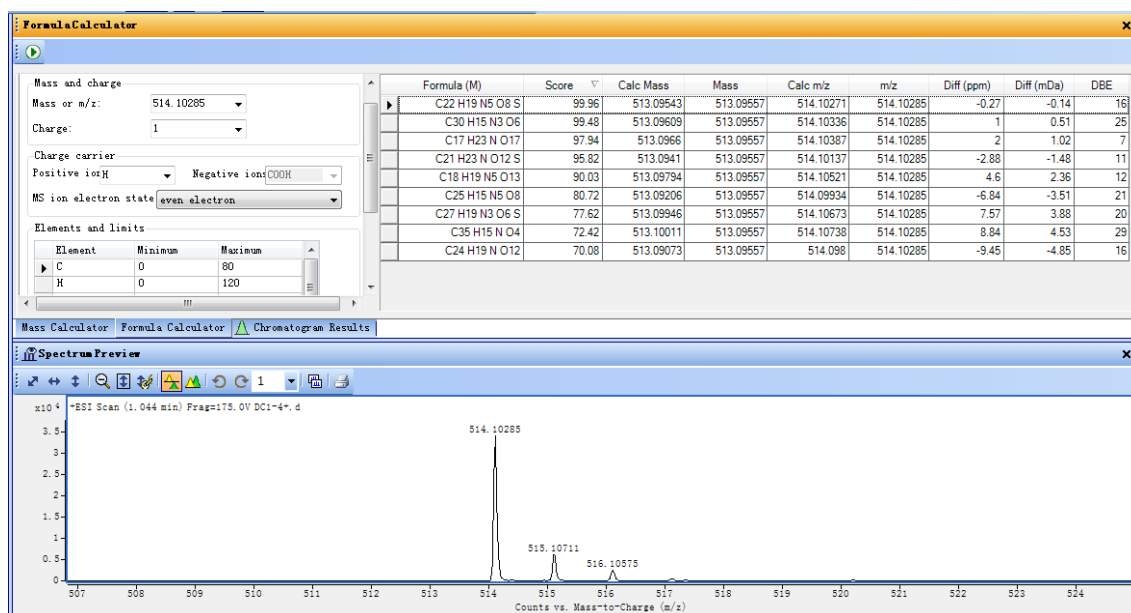

**Fig. S5** HR-ESI-MS of compound **1**.

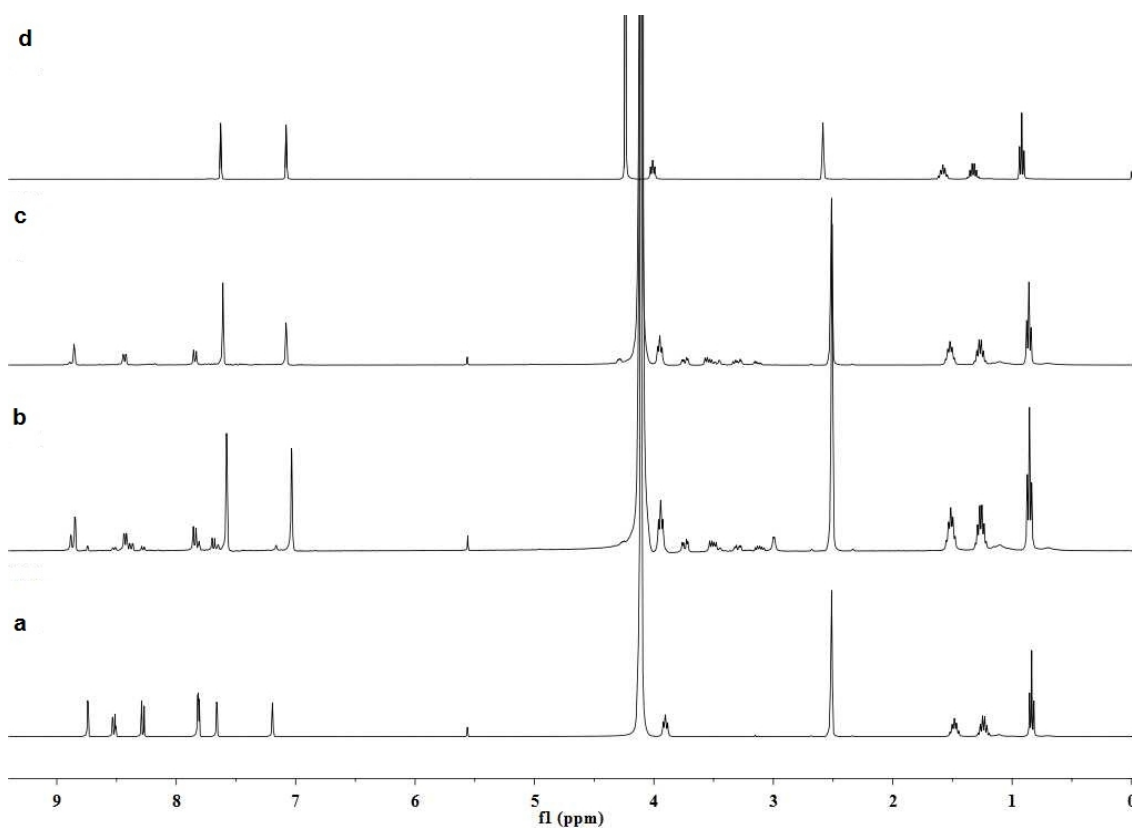

**Fig. S6**  $^1\text{H}$  NMR spectra of compound **1** in the absence (a), presence of Cys for 18 h (b) and for 72 h (c), and of compound **2** (d) in  $d_6$ -DMSO/ $\text{D}_2\text{O}$  (5/2, v/v).

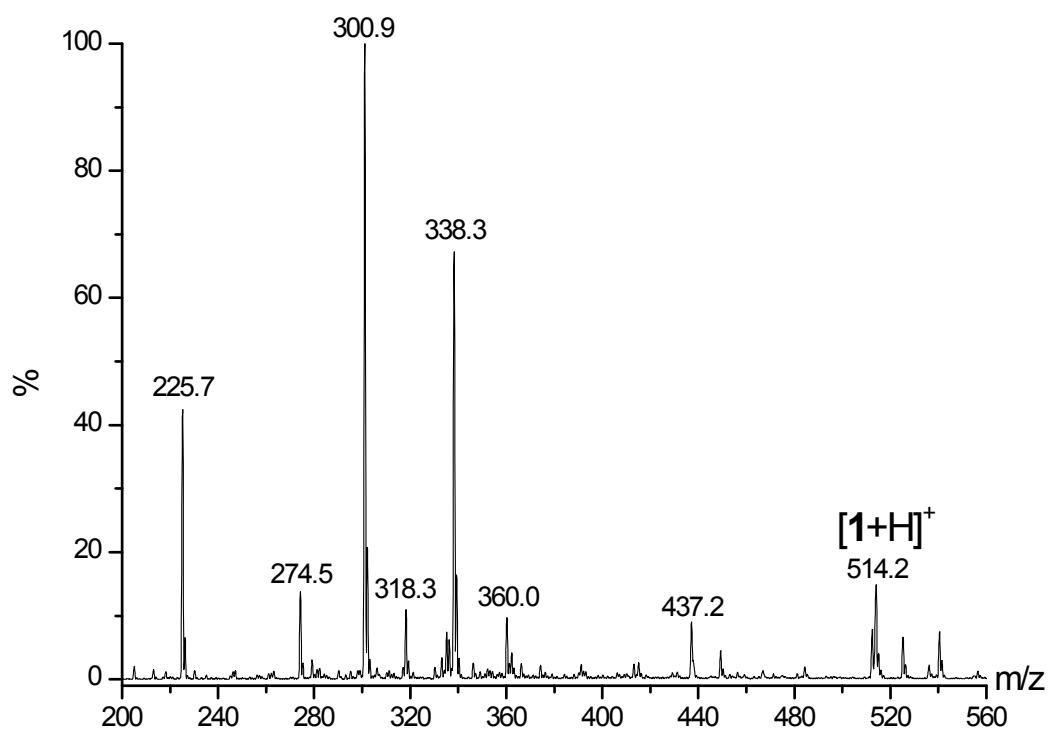

**Fig. S7** LR-ESI-MS of compound **1**.

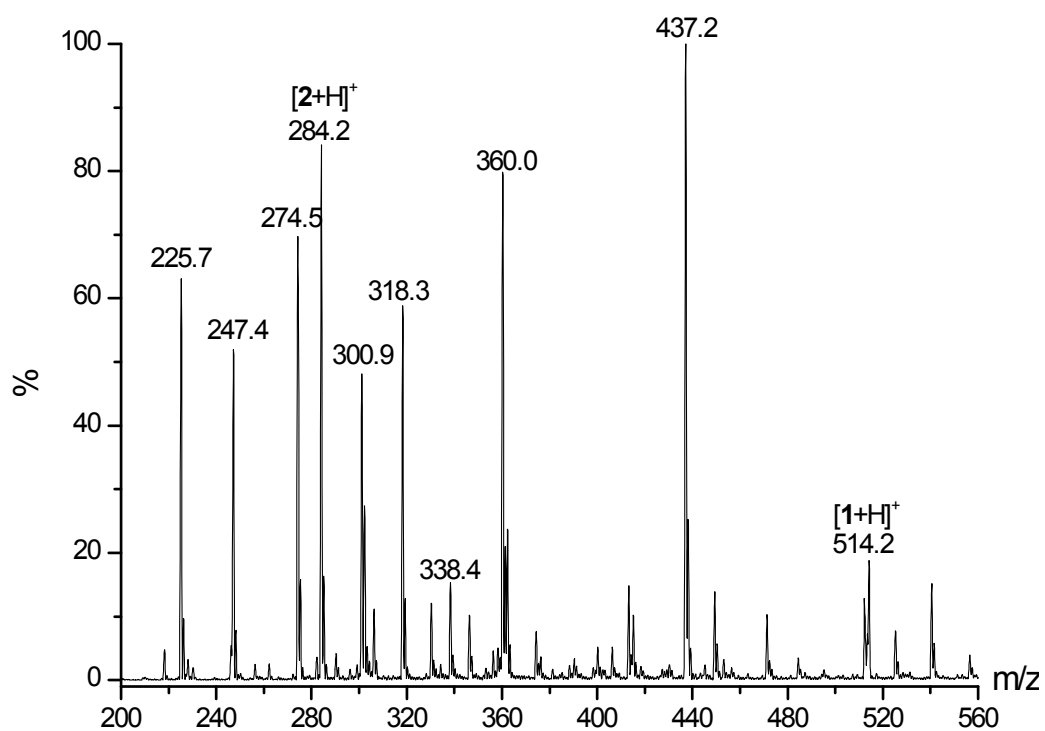

**Fig. S8** LR-ESI-MS of compound **1** titrated with Cys.

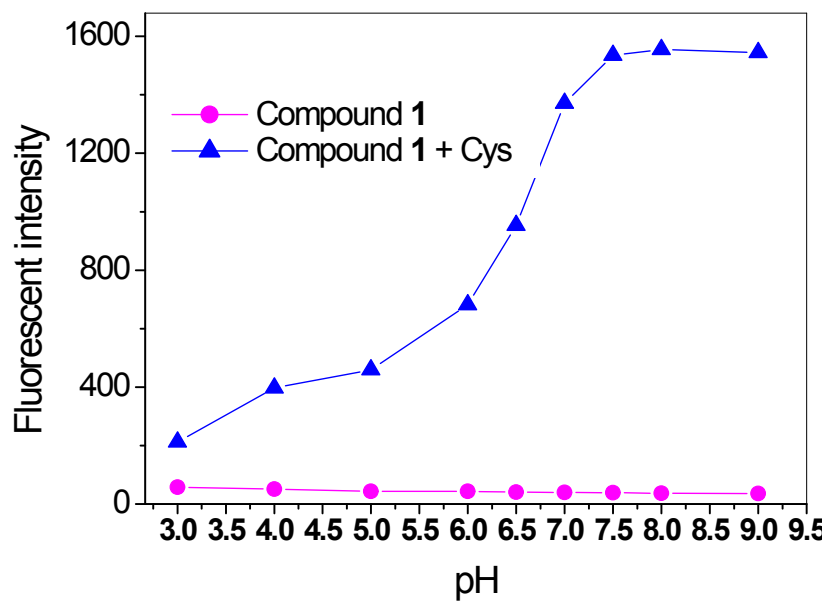

**Fig. S9** Effect of pH on the fluorescence intensities of compound **1** (25  $\mu\text{M}$ ) in the absence ( $\bullet$ ) and presence ( $\blacktriangle$ ) of Cys (250 $\mu\text{M}$ ). The reaction of compound **1** and Cys was carried out at room temperature for 120 min, in 1 : 1 DMSO-PBS buffer (0.01 M) of varying pH from 3 to 9.  $\lambda_{\text{ex}}/\lambda_{\text{em}} = 415/560$  nm.

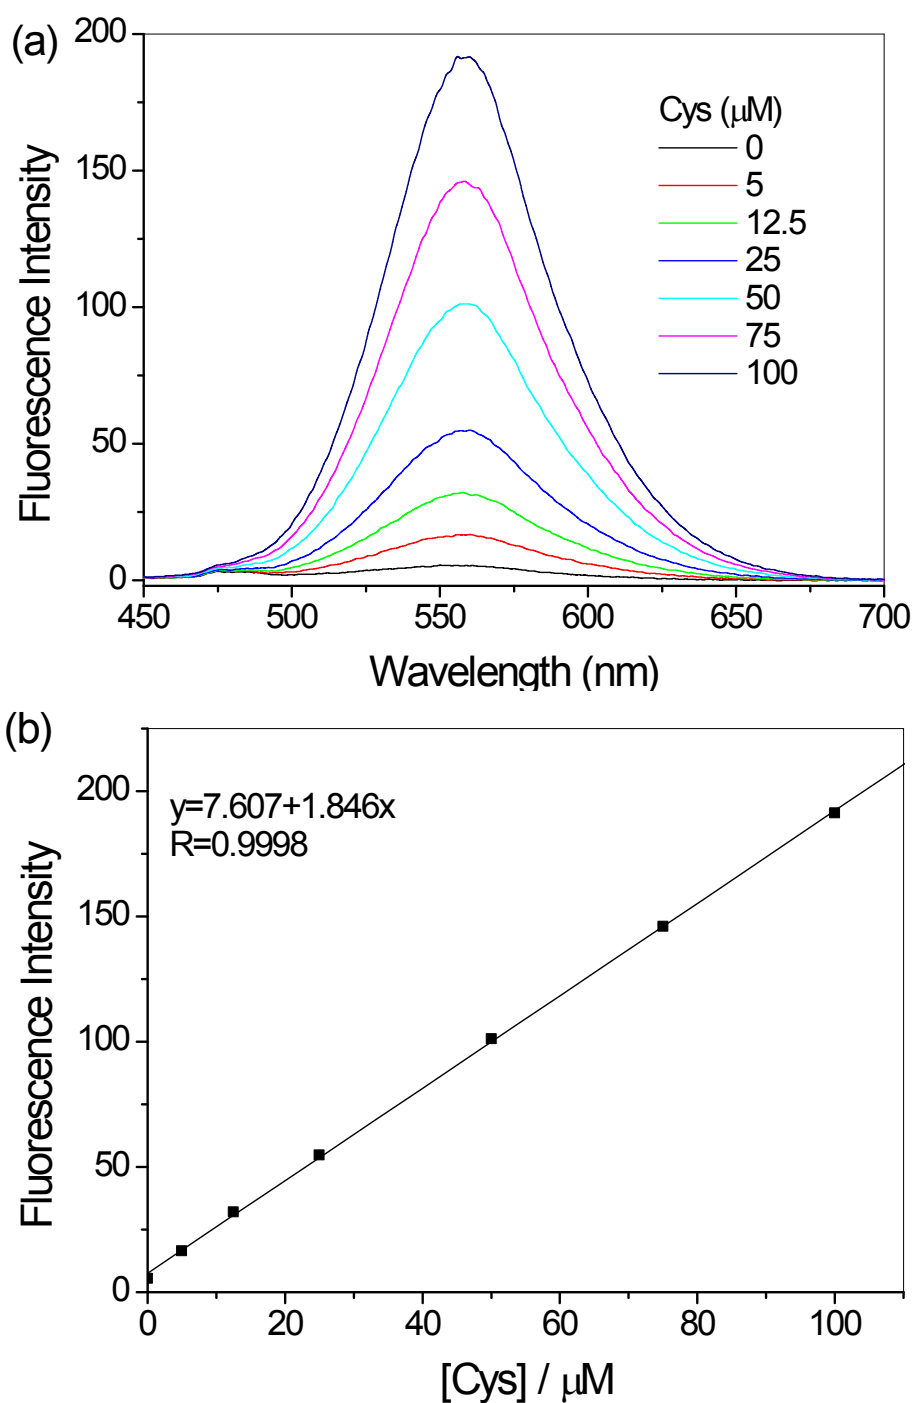

**Fig. S10** (a) Fluorescence response of compound **1** (25 μM) to Cys of varying concentrations in 1 : 1 DMSO-PBS buffer (0.01 M, pH 7.4) ( $\lambda_{\text{ex}}/\lambda_{\text{em}} = 415/560$  nm, ex/em 5/5 nm). (b) Fluorescence intensity at 560 nm of compound **1** (25 μM) upon the addition of Cys (0~100 μM).

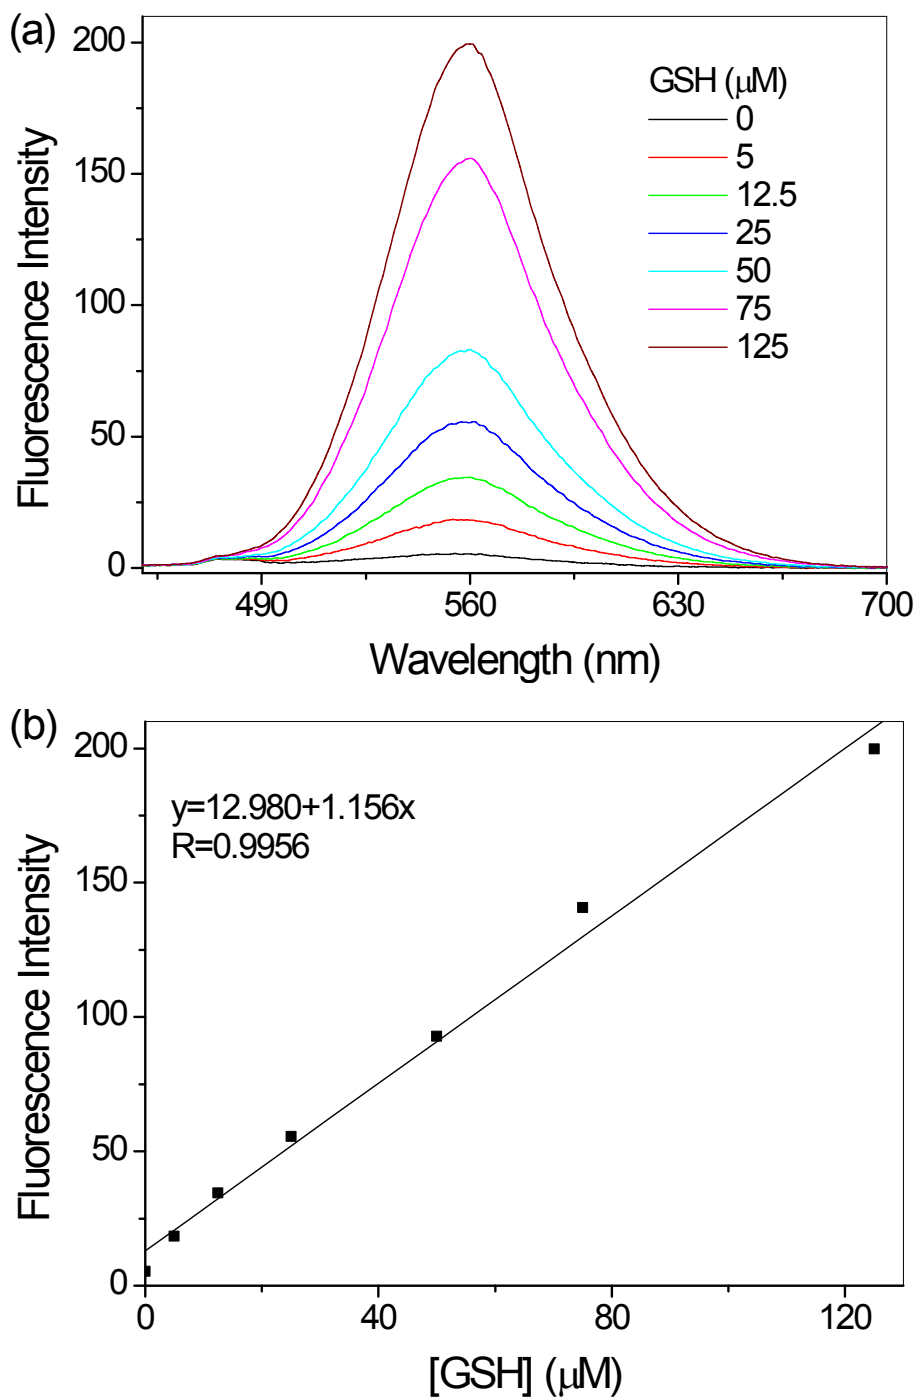

**Fig. S11** (a) Fluorescence response of compound **1** (25 μM) to GSH of varying concentrations in 1 : 1 DMSO-PBS buffer (0.01 M, pH 7.4) ( $\lambda_{\text{ex}}/\lambda_{\text{em}} = 415/560$  nm, ex/em 5/5 nm). (b) Fluorescence intensity at 560 nm of compound **1** (25 μM) upon the addition of GSH (0~150 μM).

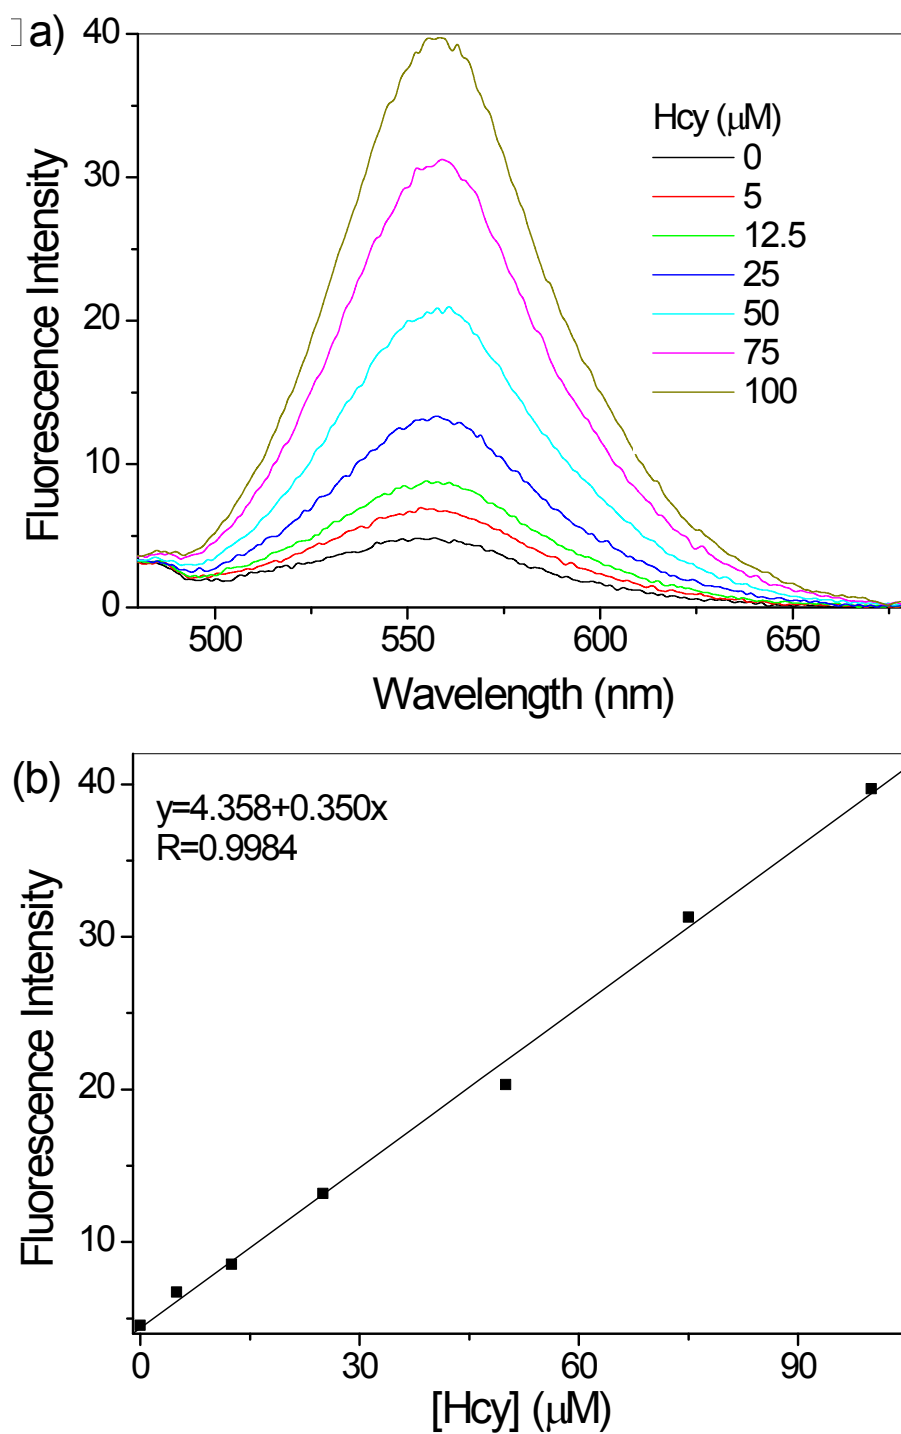

**Fig. S12** (a) Fluorescence response of compound **1** (25 μM) to Hcy of varying concentrations in 1 : 1 DMSO-PBS buffer (0.01 M, pH 7.4) ( $\lambda_{\text{ex}}/\lambda_{\text{em}} = 415/560$  nm, ex/em 5/5 nm). (b) Fluorescence intensity at 560 nm of compound **1** (25 μM) upon the addition of Hcy (0~150 μM).

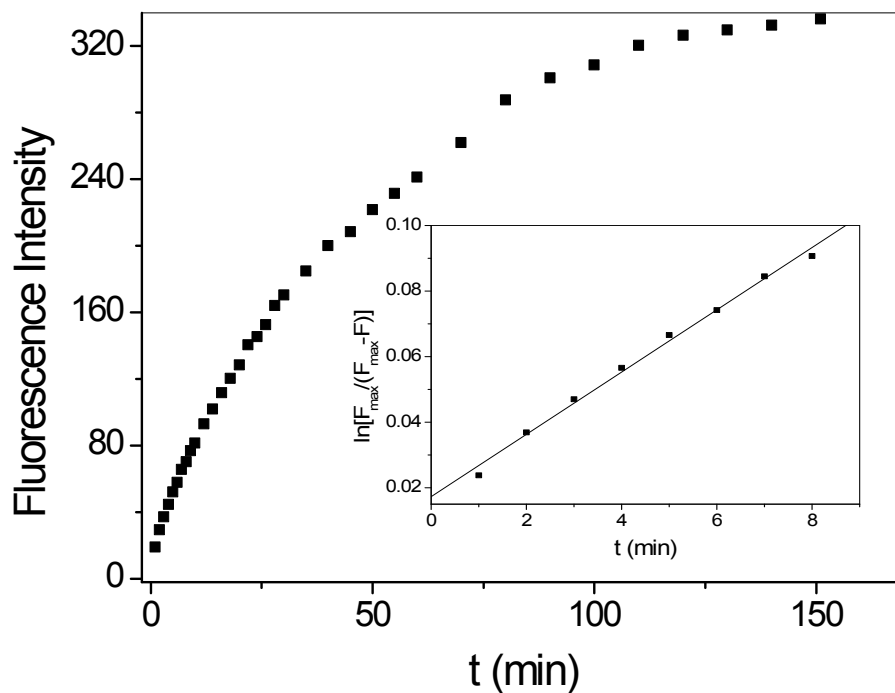

**Fig. S13** Time-dependent fluorescence response of compound **1** (25  $\mu\text{M}$ ) to GSH (1 mM) at room temperature in 1 : 1 DMSO-PBS buffer (0.01 M, pH 7.4).

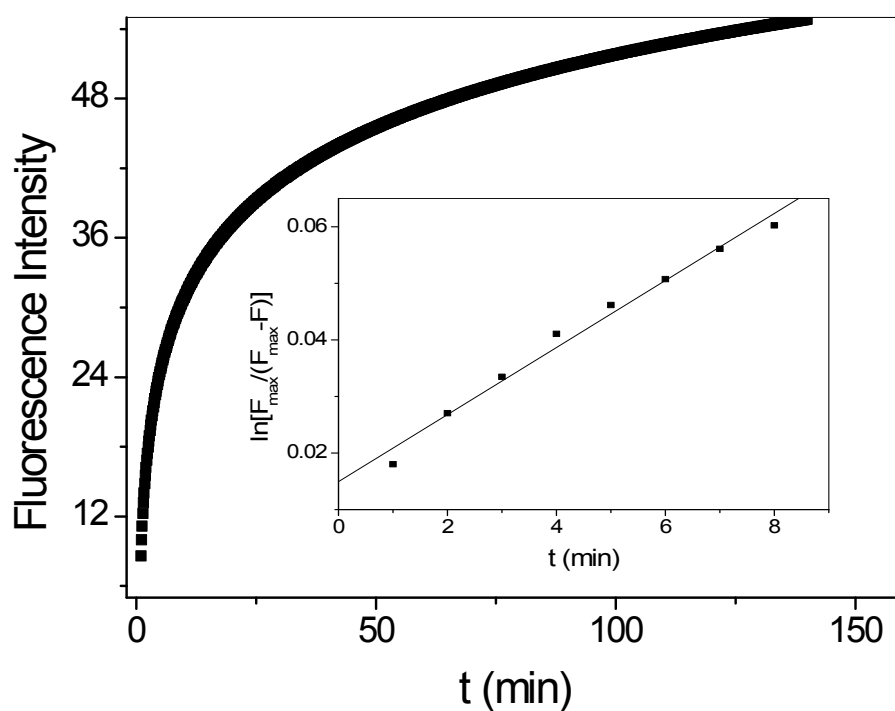

**Fig. S14** Time-dependent fluorescence response of compound **1** (25  $\mu\text{M}$ ) to Hcy (1 mM) at room temperature in 1 : 1 DMSO-PBS buffer (0.01 M, pH 7.4).
